# Supplementary material
Source: publisher figshare collection journal article supplement (https://frontiersin.figshare.com/ndownloader/files/13542131)
Supplement: Supplementary file 1 [file 13542131]

## RNA QC EUK

## 1. RNA Quantification and Quality Assurance by NanoDrop ND-1000

| Sample ID | OD260/280 Ratio | OD260/230 Ratio | Conc. (ng/μl) | Volume (μl) | Quantity (ng) | QC result Pass or Fail |
|-----------|-----------------|-----------------|---------------|-------------|---------------|------------------------|
| 3_1       | 1.98            | 2.32            | 566.80        | 40          | 22672.00      | pass                   |
| 6_25      | 2.02            | 2.17            | 672.79        | 50          | 33639.50      | pass                   |
| 21_20     | 1.96            | 1.86            | 654.33        | 40          | 26173.20      | pass                   |
| 15_11     | 2.01            | 2.36            | 876.47        | 30          | 26294.10      | pass                   |
| 17_4      | 2.00            | 2.33            | 717.13        | 50          | 35856.50      | pass                   |
| 17_11     | 2.01            | 2.32            | 660.81        | 50          | 33040.50      | pass                   |
| 28_18     | 2.00            | 2.34            | 639.66        | 50          | 31983.00      | pass                   |
| 2_26      | 1.96            | 2.33            | 577.20        | 30          | 17316.00      | pass                   |
| 18_8      | 1.97            | 2.31            | 537.93        | 50          | 26896.50      | pass                   |
| 24_14     | 2.01            | 2.33            | 620.48        | 50          | 31024.00      | pass                   |
| 27_30     | 2.01            | 2.34            | 728.05        | 50          | 36402.50      | pass                   |
| 4_4       | 1.98            | 2.32            | 654.06        | 30          | 19621.80      | pass                   |
| 14_21     | 1.91            | 2.43            | 468.02        | 30          | 14040.60      | pass                   |
| 24_22     | 1.90            | 2.42            | 471.89        | 50          | 23594.50      | pass                   |
| 15_11     | 1.95            | 2.25            | 518.80        | 50          | 25940.00      | pass                   |

\*For spectrophotometer, the O.D. A260/A280 ratio should be close to 2.0 for pure RNA (ratios between 1.8 and 2.1 are acceptable). The O.D. A260/A230 ratio should be more than 1.8.

## 2. RNA Integrity and gDNA contamination test by Denaturing Agarose Gel Electrophoresis

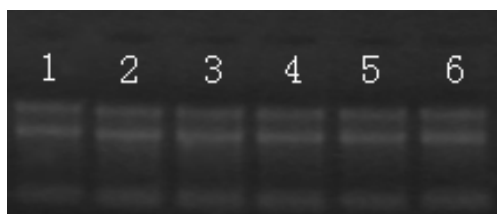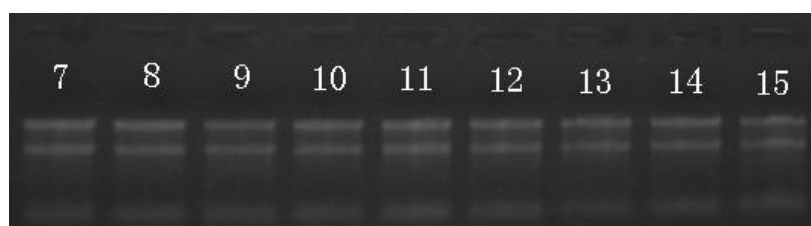

|          |                     |       |
|----------|---------------------|-------|
| Lane 1:  | Total RNA of sample | 3_1   |
| Lane 2:  | Total RNA of sample | 6_25  |
| Lane 3:  | Total RNA of sample | 21_20 |
| Lane 4:  | Total RNA of sample | 15_11 |
| Lane 5:  | Total RNA of sample | 17_4  |
| Lane 6:  | Total RNA of sample | 17_11 |
| Lane 7:  | Total RNA of sample | 28_18 |
| Lane 8:  | Total RNA of sample | 2_26  |
| Lane 9:  | Total RNA of sample | 18_8  |
| Lane 10: | Total RNA of sample | 24_14 |
| Lane 11: | Total RNA of sample | 27_30 |
| Lane 12: | Total RNA of sample | 4_4   |
| Lane 13: | Total RNA of sample | 14_21 |
| Lane 14: | Total RNA of sample | 24_22 |
| Lane 15: | Total RNA of sample | 15_11 |

\*The 28S and 18S ribosomal RNA bands should be fairly sharp, intense bands. The intensity of the upper band should be about twice that of the lower band. Smaller, more diffuse bands representing low molecular weight RNAs (tRNA and 5S ribosomal RNA) may be present. It is normal to see a diffuse smear of ethidium bromide staining material migrating between the 18S and 28S ribosomal bands, probably comprised of mRNA and other heterogeneous RNA species. DNA contamination of the RNA preparation will be evident as a high molecular weight smear or band migrating above the 28S ribosomal RNA band. Degradation of the RNA will be reflected by smearing of ribosomal RNA bands.
