# Supplementary material
Source: publisher figshare collection journal article supplement (https://frontiersin.figshare.com/ndownloader/files/13542131)
Supplement: Supplementary file 2 [file 13542131]

**Labeling Efficiency-QC**

In the experiment, 1µg RNA is used for labeling. The specific activity (pmol dyes per µg cRNA) of the labeled RNA can be obtained by the following calculation:

$$\text{Specific Activity} = \frac{\text{(pmol per } \mu\text{l dye)}}{\text{(} \mu\text{g per } \mu\text{l cRNA)}}$$

| Sample ID | Dye Name | Dye pmol/µl | cRNA Concentration (µg/µl) | Specific Activity*(pmol Dye/µg cRNA) | Volume (µl) | Total Amount (µg) |
|-----------|----------|-------------|----------------------------|--------------------------------------|-------------|-------------------|
| 3_1       | Cy3      | 16.78       | 0.71886                    | 23.34251                             | 20          | 14.3772           |
| 6_25      | Cy3      | 16.31       | 0.70795                    | 23.03835                             | 20          | 14.159            |
| 21_20     | Cy3      | 16.32       | 0.71884                    | 22.70324                             | 20          | 14.3768           |
| 15_11     | Cy3      | 16.15       | 0.70825                    | 22.80268                             | 20          | 14.165            |
| 17_4      | Cy3      | 16.54       | 0.7394                     | 22.36949                             | 20          | 14.788            |
| 17_11     | Cy3      | 16.67       | 0.71212                    | 23.40898                             | 20          | 14.2424           |
| 2_26      | Cy3      | 16.57       | 0.73789                    | 22.45592                             | 20          | 14.7578           |
| 18_8      | Cy3      | 16.95       | 0.7583                     | 22.35263                             | 20          | 15.166            |
| 24_14     | Cy3      | 16.02       | 0.74489                    | 21.50653                             | 20          | 14.8978           |
| 14_21     | Cy3      | 16.69       | 0.76526                    | 21.80958                             | 20          | 15.3052           |
| 4_4       | Cy3      | 16.72       | 0.78584                    | 21.2766                              | 20          | 15.7168           |
| 24_22     | Cy3      | 16.97       | 0.78848                    | 21.52242                             | 20          | 15.7696           |

\*For two-color, if the yield is <825 ng and the specific activity is <8.0 pmol Cy3 or Cy5 per µg cRNA do not proceed to the hybridization step. Repeat cRNA preparation.

\*For one-color, if the yield is <1.65µg and the specific activity is <9.0 pmol Cy3 or Cy5 per µg cRNA do not proceed to the hybridization step. Repeat cRNA preparation.
